# Supplementary material
Source: publisher figshare collection journal article supplement (https://acs.figshare.com/ndownloader/files/5700330)
Supplement: Supplementary file 1 [file 5700330]

#================================================
#   CIF for compounds 1 and 2, and H2etpda
#================================================
data_global

_publ_contact_author_name       'F. A. Cotton'
_publ_contact_author_address
;  Laboratory for Molecular Structure and Bonding
   Dept. of Chemistry
   Texas A&M University, PO Box  30012
   College Station, TX 77842-3012, USA
;
_publ_contact_author_email     cotton@tamu.edu
_publ_contact_author_fax       '(979) 845 9351'
_publ_contact_author_phone     '(979) 845 4432'

_publ_requested_journal        'Inorg. Chem.'

# TITLE AND AUTHOR LIST

_publ_section_title
;
Additional Steps Toward Molecular Scale Wires, Switches, Rheostats and Resistors: Further Study of (Ni5)10+ Chains Embraced by Polypyridylamide Ligands
;

loop_

       _publ_author_name
       _publ_author_address                                                   

'John F. Berry'

; Laboratory for Molecular Structure and Bonding
  Dept. of Chemistry, PO Box 30012
  College Station, TX 77842-3012, USA
;

'F. Albert Cotton'

; Laboratory for Molecular Structure and Bonding
  Dept. of Chemistry, PO Box 30012
  College Station, TX 77842-3012, USA
;

'Peng Lei'

; Laboratory for Molecular Structure and Bonding
  Dept. of Chemistry, PO Box 30012
  College Station, TX 77842-3012, USA
;

'Tongbu Lu'
; Laboratory for Molecular Structure and Bonding
  Dept. of Chemistry, PO Box 30012
  College Station, TX 77842-3012, USA 
  and 
  School of Chemistry & Chemical Engineering, 
  Sun Yat-Sen University,
  Guangzhou 510275, PRC
;

'Carlos A. Murillo'
; Laboratory for Molecular Structure and Bonding
  Dept. of Chemistry, PO Box 30012
  College Station, TX 77842-3012, USA
;

'Xiaoping Wang'

; Laboratory for Molecular Structure and Bonding
  Dept. of Chemistry, P.O. Box 30012
  College Station, TX 77842-3012, USA
;
 

#========================================================
#Compound 1.6dichloromethane
#========================================================
  
data_Ni5(etpda)4Cl2 
 
_audit_creation_method            SHELXL-97 
_chemical_name_systematic 
; 
 ? 
; 
_chemical_name_common             Ni5(etpda)4Cl2 
_chemical_melting_point           'not measured' 
_chemical_formula_moiety          'C82 H82 Cl20 N20 Ni5'  
_chemical_formula_sum 
 'C82 H82 Cl20 N20 Ni5' 
_chemical_formula_weight          2350.23 
 
loop_ 
 _atom_type_symbol 
 _atom_type_description 
 _atom_type_scat_dispersion_real 
 _atom_type_scat_dispersion_imag 
 _atom_type_scat_source 
 'C'  'C'   0.0033   0.0016 
 'International Tables Vol C Tables 4.2.6.8 and 6.1.1.4' 
 'H'  'H'   0.0000   0.0000 
 'International Tables Vol C Tables 4.2.6.8 and 6.1.1.4' 
 'N'  'N'   0.0061   0.0033 
 'International Tables Vol C Tables 4.2.6.8 and 6.1.1.4' 
 'Cl'  'Cl'   0.1484   0.1585 
 'International Tables Vol C Tables 4.2.6.8 and 6.1.1.4' 
 'Ni'  'Ni'   0.3393   1.1124 
 'International Tables Vol C Tables 4.2.6.8 and 6.1.1.4' 
 
_symmetry_cell_setting            Monoclinic 
_symmetry_space_group_name_H-M    C2/c 
 
loop_ 
 _symmetry_equiv_pos_as_xyz 
 'x, y, z' 
 '-x, y, -z+1/2' 
 'x+1/2, y+1/2, z' 
 '-x+1/2, y+1/2, -z+1/2' 
 '-x, -y, -z' 
 'x, -y, z-1/2' 
 '-x+1/2, -y+1/2, -z' 
 'x+1/2, -y+1/2, z-1/2' 
 
_cell_length_a                    16.7407(19) 
_cell_length_b                    26.753(3) 
_cell_length_c                    22.584(3) 
_cell_angle_alpha                 90.00 
_cell_angle_beta                  95.167(2) 
_cell_angle_gamma                 90.00 
_cell_volume                      10074(2) 
_cell_formula_units_Z             4 
_cell_measurement_temperature     213(2) 
_cell_measurement_reflns_used     5828
_cell_measurement_theta_min       2.366 
_cell_measurement_theta_max       23.016 
 
_exptl_crystal_description        needle 
_exptl_crystal_colour             'deep purple' 
_exptl_crystal_size_max           0.51 
_exptl_crystal_size_mid           0.13 
_exptl_crystal_size_min           0.13 
_exptl_crystal_density_meas       'not measured' 
_exptl_crystal_density_diffrn     1.550 
_exptl_crystal_density_method     'not measured' 
_exptl_crystal_F_000              4776 
_exptl_absorpt_coefficient_mu     1.501 
_exptl_absorpt_correction_type    'multi-scan'
_exptl_absorpt_correction_T_min   0.5963 
_exptl_absorpt_correction_T_max   0.8288 
_exptl_absorpt_process_details    'SADABS V2.03'
 
_exptl_special_details 
; 
 ? 
; 
 
_diffrn_ambient_temperature       213(2) 
_diffrn_radiation_wavelength      0.71073 
_diffrn_radiation_type            MoK\a 
_diffrn_radiation_source          'normal-focus sealed tube' 
_diffrn_radiation_monochromator   graphite 
_diffrn_measurement_device_type   'Bruker SMART 1000'
_diffrn_measurement_method        'omega scans' 
_diffrn_detector_area_resol_mean  '8.33 mm^-1^' 
_diffrn_standards_number          'none(area detector data)' 
_diffrn_standards_interval_count  ? 
_diffrn_standards_interval_time   ? 
_diffrn_standards_decay_%         ? 
_diffrn_reflns_number             20542 
_diffrn_reflns_av_R_equivalents   0.0454 
_diffrn_reflns_av_sigmaI/netI     0.0515 
_diffrn_reflns_limit_h_min        -12 
_diffrn_reflns_limit_h_max        18 
_diffrn_reflns_limit_k_min        -28 
_diffrn_reflns_limit_k_max        28 
_diffrn_reflns_limit_l_min        -24 
_diffrn_reflns_limit_l_max        24 
_diffrn_reflns_theta_min          1.44 
_diffrn_reflns_theta_max          22.50 
_reflns_number_total              6517 
_reflns_number_gt                 3898 
_reflns_threshold_expression      >2sigma(I) 
 
_computing_data_collection        'SMART V.5.618'
_computing_cell_refinement        'SAINT V.6.22' 
_computing_data_reduction         'SAINT V.6.22' 
_computing_structure_solution     'SHELXS-97 (Sheldrick, 1990)' 
_computing_structure_refinement   'SHELXL-97 (Sheldrick, 1997)' 
_computing_molecular_graphics     'SHELXTL (Siemens, 1996)'
_computing_publication_material   CIFTAB 
 
_refine_special_details 
; 
 Refinement of F^2^ against ALL reflections.  The weighted R-factor wR and 
 goodness of fit S are based on F^2^, conventional R-factors R are based 
 on F, with F set to zero for negative F^2^. The threshold expression of 
 F^2^ > 2sigma(F^2^) is used only for calculating R-factors(gt) etc. and is 
 not relevant to the choice of reflections for refinement.  R-factors based 
 on F^2^ are statistically about twice as large as those based on F, and R- 
 factors based on ALL data will be even larger. 
; 
 
_refine_ls_structure_factor_coef  Fsqd  
_refine_ls_matrix_type            full 
_refine_ls_weighting_scheme       calc  
_refine_ls_weighting_details 
 'calc w=1/[\s^2^(Fo^2^)+(0.0743P)^2^+156.9638P] where P=(Fo^2^+2Fc^2^)/3' 
_atom_sites_solution_primary      direct 
_atom_sites_solution_secondary    difmap 
_atom_sites_solution_hydrogens    geom 
_refine_ls_hydrogen_treatment     mixed 
_refine_ls_extinction_method      none 
_refine_ls_extinction_coef        ? 
_refine_ls_number_reflns          6517 
_refine_ls_number_parameters      609 
_refine_ls_number_restraints      92 
_refine_ls_R_factor_all           0.1264 
_refine_ls_R_factor_gt            0.0799 
_refine_ls_wR_factor_ref          0.2224 
_refine_ls_wR_factor_gt           0.1913 
_refine_ls_goodness_of_fit_ref    1.093 
_refine_ls_restrained_S_all       1.103 
_refine_ls_shift/su_max           0.004 
_refine_ls_shift/su_mean          0.000 
 
loop_ 
 _atom_site_label 
 _atom_site_type_symbol 
 _atom_site_fract_x 
 _atom_site_fract_y 
 _atom_site_fract_z 
 _atom_site_U_iso_or_equiv 
 _atom_site_adp_type 
 _atom_site_occupancy 
 _atom_site_symmetry_multiplicity 
 _atom_site_calc_flag 
 _atom_site_refinement_flags 
 _atom_site_disorder_assembly 
 _atom_site_disorder_group 
Ni1 Ni 0.5000 0.16401(6) 0.2500 0.0351(4) Uani 1 2 d S . . 
Ni2 Ni 0.5000 0.25330(6) 0.2500 0.0274(4) Uani 1 2 d S . . 
Ni3 Ni 0.5000 0.33944(6) 0.2500 0.0247(4) Uani 1 2 d S . . 
Ni4 Ni 0.5000 0.42557(6) 0.2500 0.0281(4) Uani 1 2 d S . . 
Ni5 Ni 0.5000 0.51464(6) 0.2500 0.0353(5) Uani 1 2 d S . . 
Cl1 Cl 0.5000 0.07525(13) 0.2500 0.0547(10) Uani 1 2 d S . . 
Cl2 Cl 0.5000 0.60320(11) 0.2500 0.0448(9) Uani 1 2 d S . . 
N1 N 0.4516(5) 0.1741(3) 0.1620(3) 0.038(2) Uani 1 1 d . . . 
N2 N 0.4960(5) 0.2567(3) 0.1653(3) 0.043(2) Uani 1 1 d . . . 
N3 N 0.5369(4) 0.3394(2) 0.1726(3) 0.0290(17) Uani 1 1 d . . . 
N4 N 0.5719(5) 0.4231(3) 0.1907(3) 0.047(2) Uani 1 1 d . . . 
N5 N 0.6129(5) 0.5036(3) 0.2162(3) 0.041(2) Uani 1 1 d . . . 
N6 N 0.4403(5) 0.5046(3) 0.1643(3) 0.043(2) Uani 1 1 d . . . 
N7 N 0.4127(5) 0.4226(3) 0.1908(3) 0.045(2) Uani 1 1 d . . . 
N8 N 0.3920(4) 0.3393(3) 0.2158(3) 0.0323(18) Uani 1 1 d . . . 
N9 N 0.3854(5) 0.2571(3) 0.2448(4) 0.041(2) Uani 1 1 d . . . 
N10 N 0.3839(5) 0.1739(3) 0.2779(3) 0.0373(19) Uani 1 1 d . B . 
C1 C 0.2490(9) 0.1774(6) -0.0187(6) 0.090(4) Uani 1 1 d . . . 
H1A H 0.2251 0.1826 -0.0590 0.135 Uiso 1 1 calc R . . 
H1B H 0.2218 0.1982 0.0084 0.135 Uiso 1 1 calc R . . 
H1C H 0.2437 0.1426 -0.0079 0.135 Uiso 1 1 calc R . . 
C2 C 0.3352(7) 0.1911(5) -0.0152(5) 0.064(3) Uani 1 1 d . . . 
H2A H 0.3399 0.2260 -0.0274 0.077 Uiso 1 1 calc R . . 
H2B H 0.3619 0.1703 -0.0432 0.077 Uiso 1 1 calc R . . 
C3 C 0.3784(6) 0.1847(4) 0.0470(4) 0.048(3) Uani 1 1 d . . . 
C4 C 0.3784(7) 0.1393(4) 0.0760(5) 0.059(3) Uani 1 1 d . . . 
H4A H 0.3538 0.1111 0.0573 0.070 Uiso 1 1 calc R . . 
C5 C 0.4148(6) 0.1360(4) 0.1326(5) 0.049(3) Uani 1 1 d . . . 
H5A H 0.4139 0.1050 0.1520 0.059 Uiso 1 1 calc R . . 
C6 C 0.4173(6) 0.2243(4) 0.0750(4) 0.050(3) Uani 1 1 d . . . 
H6A H 0.4184 0.2554 0.0557 0.060 Uiso 1 1 calc R . . 
C7 C 0.4558(6) 0.2185(4) 0.1327(4) 0.045(3) Uani 1 1 d . . . 
C8 C 0.5317(6) 0.2973(3) 0.1391(4) 0.039(2) Uani 1 1 d . . . 
C9 C 0.5627(7) 0.2960(4) 0.0843(4) 0.053(3) Uani 1 1 d . . . 
H9A H 0.5627 0.2662 0.0623 0.064 Uiso 1 1 calc R . . 
C10 C 0.5933(7) 0.3391(4) 0.0626(4) 0.050(3) Uani 1 1 d . . . 
H10A H 0.6129 0.3388 0.0249 0.060 Uiso 1 1 calc R . . 
C11 C 0.5960(7) 0.3834(4) 0.0951(4) 0.053(3) Uani 1 1 d . . . 
H11A H 0.6145 0.4133 0.0793 0.063 Uiso 1 1 calc R . . 
C12 C 0.5697(6) 0.3817(3) 0.1525(4) 0.041(2) Uani 1 1 d . . . 
C13 C 0.6322(7) 0.4593(4) 0.1927(5) 0.049(3) Uani 1 1 d . . . 
C14 C 0.7116(6) 0.4499(4) 0.1798(5) 0.053(3) Uani 1 1 d . . . 
H14A H 0.7256 0.4177 0.1674 0.064 Uiso 1 1 calc R . . 
C15 C 0.7692(6) 0.4867(4) 0.1848(5) 0.051(3) Uani 1 1 d D A . 
C16 C 0.7450(7) 0.5326(4) 0.2059(6) 0.064(3) Uani 1 1 d . . . 
H16A H 0.7814 0.5594 0.2094 0.077 Uiso 1 1 calc R . . 
C17 C 0.6694(7) 0.5389(4) 0.2213(5) 0.054(3) Uani 1 1 d . . . 
H17A H 0.6558 0.5702 0.2366 0.064 Uiso 1 1 calc R . . 
C18 C 0.8542(7) 0.4763(5) 0.1706(6) 0.077(4) Uiso 1 1 d D . . 
C19 C 0.898(7) 0.454(4) 0.226(3) 0.15(5) Uiso 0.20 1 d PD A 1 
H19A H 0.9528 0.4462 0.2180 0.221 Uiso 0.20 1 calc PR A 1 
H19B H 0.8712 0.4228 0.2355 0.221 Uiso 0.20 1 calc PR A 1 
H19C H 0.8975 0.4769 0.2584 0.221 Uiso 0.20 1 calc PR A 1 
C19A C 0.889(3) 0.4330(14) 0.2068(19) 0.115(17) Uiso 0.40 1 d PD A 2 
H19D H 0.9437 0.4269 0.1967 0.173 Uiso 0.40 1 calc PR A 2 
H19E H 0.8571 0.4034 0.1981 0.173 Uiso 0.40 1 calc PR A 2 
H19F H 0.8903 0.4409 0.2487 0.173 Uiso 0.40 1 calc PR A 2 
C19B C 0.860(3) 0.4891(16) 0.1056(11) 0.116(14) Uiso 0.40 1 d PD A 3 
H19G H 0.9143 0.4826 0.0955 0.175 Uiso 0.40 1 calc PR A 3 
H19H H 0.8474 0.5241 0.0990 0.175 Uiso 0.40 1 calc PR A 3 
H19I H 0.8227 0.4687 0.0809 0.175 Uiso 0.40 1 calc PR A 3 
C20 C 0.3918(15) 0.4670(8) -0.0492(8) 0.191(12) Uani 1 1 d D . . 
H20A H 0.3698 0.4607 -0.0897 0.286 Uiso 1 1 calc R . . 
H20B H 0.4164 0.4367 -0.0325 0.286 Uiso 1 1 calc R . . 
H20C H 0.4319 0.4932 -0.0491 0.286 Uiso 1 1 calc R . . 
C21 C 0.3277(11) 0.4827(5) -0.0137(6) 0.101(6) Uani 1 1 d D . . 
H21A H 0.2864 0.4567 -0.0135 0.121 Uiso 1 1 calc R . . 
H21B H 0.3027 0.5136 -0.0295 0.121 Uiso 1 1 calc R . . 
C22 C 0.3677(8) 0.4911(4) 0.0488(5) 0.066(3) Uani 1 1 d . . . 
C23 C 0.3988(9) 0.5367(4) 0.0692(6) 0.084(5) Uani 1 1 d . . . 
H23A H 0.3955 0.5645 0.0436 0.101 Uiso 1 1 calc R . . 
C24 C 0.4334(8) 0.5419(4) 0.1250(5) 0.064(3) Uani 1 1 d . . . 
H24A H 0.4537 0.5734 0.1369 0.077 Uiso 1 1 calc R . . 
C25 C 0.3738(8) 0.4525(4) 0.0891(5) 0.065(4) Uani 1 1 d . . . 
H25A H 0.3557 0.4205 0.0772 0.078 Uiso 1 1 calc R . . 
C26 C 0.4066(7) 0.4602(4) 0.1480(4) 0.053(3) Uani 1 1 d . . . 
C27 C 0.3598(6) 0.3821(4) 0.1911(4) 0.045(3) Uani 1 1 d . . . 
C28 C 0.2783(6) 0.3844(4) 0.1714(5) 0.049(3) Uani 1 1 d . . . 
H28A H 0.2543 0.4147 0.1582 0.059 Uiso 1 1 calc R . . 
C29 C 0.2342(6) 0.3408(4) 0.1717(4) 0.044(3) Uani 1 1 d . . . 
H29A H 0.1799 0.3412 0.1568 0.053 Uiso 1 1 calc R . . 
C30 C 0.2669(6) 0.2976(4) 0.1929(5) 0.052(3) Uani 1 1 d . . . 
H30A H 0.2367 0.2680 0.1908 0.062 Uiso 1 1 calc R . . 
C31 C 0.3469(6) 0.2975(3) 0.2180(4) 0.044(3) Uani 1 1 d . . . 
C32 C 0.3462(6) 0.2192(4) 0.2731(5) 0.047(3) Uani 1 1 d . . . 
C33 C 0.2727(6) 0.2270(4) 0.2987(5) 0.054(3) Uani 1 1 d . B . 
H33A H 0.2493 0.2590 0.2979 0.064 Uiso 1 1 calc R . . 
C34 C 0.2362(6) 0.1880(4) 0.3244(5) 0.048(3) Uani 1 1 d D . . 
C35 C 0.2724(8) 0.1415(4) 0.3234(6) 0.068(4) Uani 1 1 d . B . 
H35A H 0.2466 0.1134 0.3377 0.081 Uiso 1 1 calc R . . 
C36 C 0.3455(7) 0.1363(4) 0.3017(5) 0.056(3) Uani 1 1 d . . . 
H36A H 0.3699 0.1047 0.3036 0.067 Uiso 1 1 calc R B . 
C37 C 0.1582(14) 0.198(3) 0.3518(16) 0.073(12) Uani 0.76(7) 1 d PD B 1 
H37A H 0.1320 0.2273 0.3329 0.088 Uiso 0.76(7) 1 calc PR B 1 
H37B H 0.1223 0.1693 0.3444 0.088 Uiso 0.76(7) 1 calc PR B 1 
C38 C 0.172(2) 0.207(2) 0.4177(13) 0.154(19) Uani 0.76(7) 1 d PD B 1 
H38A H 0.1215 0.2135 0.4337 0.231 Uiso 0.76(7) 1 calc PR B 1 
H38B H 0.2077 0.2352 0.4252 0.231 Uiso 0.76(7) 1 calc PR B 1 
H38C H 0.1968 0.1774 0.4368 0.231 Uiso 0.76(7) 1 calc PR B 1 
C37' C 0.154(4) 0.188(10) 0.348(5) 0.073(12) Uani 0.24(7) 1 d PD B 2 
H37C H 0.1318 0.2223 0.3459 0.088 Uiso 0.24(7) 1 calc PR B 2 
H37D H 0.1173 0.1665 0.3235 0.088 Uiso 0.24(7) 1 calc PR B 2 
C38' C 0.162(8) 0.170(6) 0.411(5) 0.154(19) Uani 0.24(7) 1 d PD B 2 
H38D H 0.1099 0.1707 0.4267 0.231 Uiso 0.24(7) 1 calc PR B 2 
H38E H 0.1985 0.1921 0.4349 0.231 Uiso 0.24(7) 1 calc PR B 2 
H38F H 0.1831 0.1365 0.4125 0.231 Uiso 0.24(7) 1 calc PR B 2 
Cl1S Cl 0.5483(3) 0.67024(19) 0.07174(19) 0.1190(16) Uani 1 1 d D . . 
C1S C 0.5923(5) 0.6735(4) 0.1445(4) 0.081(4) Uani 1 1 d D . . 
H1S H 0.5691 0.6469 0.1681 0.097 Uiso 1 1 calc R . . 
Cl2S Cl 0.6960(2) 0.66444(14) 0.14705(17) 0.0903(11) Uani 1 1 d D . . 
Cl3S Cl 0.5721(2) 0.73120(16) 0.1761(2) 0.1137(15) Uani 1 1 d D . . 
Cl4S Cl 0.8166(12) 0.5146(8) 0.3811(9) 0.214(5) Uani 0.720(6) 1 d PD C 1 
C2S C 0.9174(11) 0.5013(4) 0.3743(9) 0.190(13) Uani 0.720(6) 1 d PD C 1 
H2S H 0.9327 0.5103 0.3343 0.228 Uiso 0.720(6) 1 calc PR C 1 
Cl5S Cl 0.9334(6) 0.4373(3) 0.3892(5) 0.174(3) Uiso 0.720(6) 1 d PD C 1 
Cl6S Cl 0.9761(6) 0.5330(4) 0.4299(4) 0.189(4) Uiso 0.720(6) 1 d PD C 1 
Cl4B Cl 0.814(3) 0.512(2) 0.3630(19) 0.214(5) Uani 0.280(6) 1 d PD C 2 
C2SB C 0.906(2) 0.4843(9) 0.3834(12) 0.190(13) Uani 0.280(6) 1 d PD C 2 
H2SB H 0.9495 0.5096 0.3901 0.228 Uiso 0.280(6) 1 calc PR C 2 
Cl5B Cl 0.9271(15) 0.4410(9) 0.3283(10) 0.174(3) Uiso 0.280(6) 1 d PD C 2 
Cl6B Cl 0.8976(16) 0.4477(10) 0.4468(10) 0.189(4) Uiso 0.280(6) 1 d PD C 2 
Cl7S Cl 0.931(2) 0.3352(15) 0.0150(14) 0.163(3) Uani 0.188(3) 1 d PD D 1 
C3S C 0.8974(19) 0.3598(13) 0.0798(14) 0.21(2) Uani 0.188(3) 1 d PD D 1 
H3S H 0.8961 0.3968 0.0778 0.254 Uiso 0.188(3) 1 calc PR D 1 
Cl8S Cl 0.8014(17) 0.336(2) 0.0886(19) 0.204(6) Uani 0.188(3) 1 d PDU D 1 
Cl9S Cl 0.960(2) 0.3400(16) 0.1415(16) 0.199(5) Uani 0.188(3) 1 d PD D 1 
Cl7B Cl 0.8895(6) 0.3449(4) -0.0413(4) 0.163(3) Uani 0.673(5) 1 d PD E 2 
C3SB C 0.8982(9) 0.3643(7) 0.0324(6) 0.21(2) Uani 0.673(5) 1 d PD E 2 
H3SB H 0.9229 0.3979 0.0361 0.254 Uiso 0.673(5) 1 calc PR E 2 
Cl8B Cl 0.8024(6) 0.3651(5) 0.0575(5) 0.204(6) Uani 0.673(5) 1 d PDU E 2 
Cl9B Cl 0.9585(6) 0.3203(4) 0.0724(6) 0.199(5) Uani 0.673(5) 1 d PD E 2 
Cl7C Cl 0.915(3) 0.334(3) 0.2278(18) 0.190 Uiso 0.139(4) 1 d PD . 3 
C3SC C 1.0000 0.2984(10) 0.2500 0.190 Uiso 0.279(9) 2 d SPD . 3 
Cl8C Cl 1.078(3) 0.336(3) 0.281(2) 0.190 Uiso 0.139(4) 1 d PD . 3 
Cl9C Cl 1.032(3) 0.2650(18) 0.1899(15) 0.190 Uiso 0.139(4) 1 d PD . 3 
 
loop_ 
 _atom_site_aniso_label 
 _atom_site_aniso_U_11 
 _atom_site_aniso_U_22 
 _atom_site_aniso_U_33 
 _atom_site_aniso_U_23 
 _atom_site_aniso_U_13 
 _atom_site_aniso_U_12 
Ni1 0.0369(11) 0.0256(9) 0.0422(10) 0.000 -0.0007(8) 0.000 
Ni2 0.0264(10) 0.0250(9) 0.0308(9) 0.000 0.0029(7) 0.000 
Ni3 0.0250(9) 0.0241(8) 0.0254(8) 0.000 0.0054(6) 0.000 
Ni4 0.0305(10) 0.0250(9) 0.0295(9) 0.000 0.0074(7) 0.000 
Ni5 0.0433(11) 0.0236(9) 0.0400(10) 0.000 0.0087(8) 0.000 
Cl1 0.063(3) 0.035(2) 0.065(2) 0.000 -0.006(2) 0.000 
Cl2 0.061(3) 0.0182(16) 0.057(2) 0.000 0.0162(18) 0.000 
N1 0.046(5) 0.026(5) 0.040(5) -0.004(3) -0.004(4) 0.003(4) 
N2 0.044(5) 0.034(5) 0.050(5) -0.002(4) 0.005(4) -0.003(4) 
N3 0.032(4) 0.020(4) 0.036(4) -0.006(3) 0.009(3) -0.007(4) 
N4 0.059(6) 0.036(5) 0.046(5) -0.004(4) 0.014(4) -0.001(4) 
N5 0.047(5) 0.031(5) 0.045(5) -0.002(4) 0.009(4) -0.006(4) 
N6 0.055(6) 0.024(5) 0.049(5) 0.009(4) 0.005(4) -0.001(4) 
N7 0.051(6) 0.032(5) 0.053(5) 0.002(4) 0.009(4) 0.003(4) 
N8 0.032(5) 0.026(4) 0.040(4) 0.009(3) 0.006(3) -0.003(4) 
N9 0.036(5) 0.033(5) 0.056(5) 0.007(4) 0.003(4) 0.002(4) 
N10 0.036(5) 0.019(4) 0.058(5) 0.004(3) 0.007(4) 0.000(4) 
C1 0.079(11) 0.123(13) 0.064(9) -0.004(8) -0.012(7) 0.001(9) 
C2 0.063(9) 0.066(8) 0.059(7) -0.012(6) -0.015(6) -0.004(7) 
C3 0.052(7) 0.047(6) 0.041(6) -0.010(5) -0.012(5) -0.007(6) 
C4 0.073(9) 0.041(6) 0.056(7) -0.012(5) -0.025(6) -0.010(6) 
C5 0.058(7) 0.022(5) 0.066(7) 0.005(5) -0.007(6) -0.011(5) 
C6 0.060(8) 0.039(6) 0.049(6) -0.002(5) -0.009(5) 0.005(6) 
C7 0.051(7) 0.033(6) 0.050(6) -0.012(5) 0.000(5) 0.007(5) 
C8 0.046(6) 0.033(6) 0.039(6) 0.001(4) 0.012(5) -0.007(5) 
C9 0.073(8) 0.044(6) 0.046(6) -0.011(5) 0.019(6) -0.018(6) 
C10 0.064(8) 0.052(7) 0.037(6) -0.004(5) 0.019(5) -0.011(6) 
C11 0.090(9) 0.031(6) 0.042(6) 0.001(5) 0.034(6) -0.017(6) 
C12 0.043(6) 0.033(6) 0.048(6) -0.011(5) 0.014(5) -0.003(5) 
C13 0.051(7) 0.036(6) 0.065(7) -0.006(5) 0.022(6) -0.016(6) 
C14 0.049(7) 0.030(6) 0.083(8) -0.010(5) 0.024(6) -0.009(5) 
C15 0.036(6) 0.051(7) 0.069(7) -0.004(5) 0.018(5) -0.012(6) 
C16 0.046(8) 0.040(7) 0.108(10) -0.015(6) 0.024(7) -0.014(6) 
C17 0.063(8) 0.026(6) 0.073(8) -0.004(5) 0.014(6) -0.002(6) 
C20 0.34(4) 0.15(2) 0.076(13) -0.011(13) 0.006(18) 0.04(2) 
C21 0.175(17) 0.070(9) 0.052(8) 0.023(7) -0.016(10) -0.020(11) 
C22 0.092(10) 0.051(7) 0.052(7) 0.017(6) -0.004(6) -0.008(7) 
C23 0.153(14) 0.025(6) 0.072(9) 0.020(6) -0.007(9) -0.015(8) 
C24 0.104(11) 0.033(6) 0.053(7) 0.010(5) -0.005(7) 0.007(6) 
C25 0.099(10) 0.044(7) 0.047(7) 0.008(5) -0.020(6) -0.018(7) 
C26 0.075(8) 0.034(6) 0.048(7) 0.011(5) 0.004(6) -0.001(6) 
C27 0.046(7) 0.031(6) 0.057(7) -0.003(5) 0.005(5) -0.008(5) 
C28 0.036(6) 0.035(6) 0.074(7) 0.002(5) -0.009(5) 0.003(5) 
C29 0.022(5) 0.050(7) 0.059(6) 0.015(5) -0.004(5) 0.005(5) 
C30 0.031(6) 0.043(6) 0.078(8) 0.017(5) -0.012(5) -0.014(5) 
C31 0.047(7) 0.029(6) 0.056(7) 0.004(5) 0.000(5) -0.002(5) 
C32 0.033(6) 0.040(6) 0.068(7) 0.002(5) 0.008(5) -0.013(5) 
C33 0.047(7) 0.036(6) 0.081(8) 0.007(5) 0.024(6) -0.001(5) 
C34 0.038(7) 0.046(7) 0.062(7) 0.015(5) 0.009(5) -0.004(5) 
C35 0.068(9) 0.043(7) 0.096(9) 0.025(6) 0.034(7) -0.015(7) 
C36 0.060(8) 0.025(6) 0.083(8) 0.012(5) 0.014(6) -0.011(6) 
C37 0.057(9) 0.06(3) 0.105(12) 0.033(13) 0.031(8) -0.008(10) 
C38 0.16(2) 0.20(5) 0.114(18) 0.07(3) 0.092(17) 0.11(3) 
C37' 0.057(9) 0.06(3) 0.105(12) 0.033(13) 0.031(8) -0.008(10) 
C38' 0.16(2) 0.20(5) 0.114(18) 0.07(3) 0.092(17) 0.11(3) 
Cl1S 0.102(3) 0.153(4) 0.099(3) 0.006(3) -0.007(2) -0.033(3) 
C1S 0.090(11) 0.065(9) 0.089(10) 0.008(7) 0.020(8) -0.038(8) 
Cl2S 0.083(3) 0.077(2) 0.110(3) 0.007(2) 0.003(2) -0.006(2) 
Cl3S 0.069(3) 0.106(3) 0.169(4) -0.032(3) 0.025(3) -0.021(2) 
Cl4S 0.148(6) 0.087(4) 0.410(16) 0.059(9) 0.036(9) -0.004(4) 
C2S 0.13(2) 0.029(14) 0.40(4) -0.002(19) -0.01(2) 0.006(14) 
Cl4B 0.148(6) 0.087(4) 0.410(16) 0.059(9) 0.036(9) -0.004(4) 
C2SB 0.13(2) 0.029(14) 0.40(4) -0.002(19) -0.01(2) 0.006(14) 
Cl7S 0.169(9) 0.173(8) 0.152(7) -0.011(7) 0.042(6) 0.011(7) 
C3S 0.10(2) 0.18(3) 0.36(6) -0.18(4) 0.01(3) 0.04(2) 
Cl8S 0.122(6) 0.249(14) 0.245(12) -0.117(10) 0.041(7) 0.007(7) 
Cl9S 0.142(8) 0.223(11) 0.228(12) 0.054(10) -0.014(8) 0.015(7) 
Cl7B 0.169(9) 0.173(8) 0.152(7) -0.011(7) 0.042(6) 0.011(7) 
C3SB 0.10(2) 0.18(3) 0.36(6) -0.18(4) 0.01(3) 0.04(2) 
Cl8B 0.122(6) 0.249(14) 0.245(12) -0.117(10) 0.041(7) 0.007(7) 
Cl9B 0.142(8) 0.223(11) 0.228(12) 0.054(10) -0.014(8) 0.015(7) 
 
_geom_special_details 
; 
 All esds (except the esd in the dihedral angle between two l.s. planes) 
 are estimated using the full covariance matrix.  The cell esds are taken 
 into account individually in the estimation of esds in distances, angles 
 and torsion angles; correlations between esds in cell parameters are only 
 used when they are defined by crystal symmetry.  An approximate (isotropic) 
 treatment of cell esds is used for estimating esds involving l.s. planes. 
; 
 
loop_ 
 _geom_bond_atom_site_label_1 
 _geom_bond_atom_site_label_2 
 _geom_bond_distance 
 _geom_bond_site_symmetry_2 
 _geom_bond_publ_flag 
Ni1 N1 2.095(7) . ? 
Ni1 N1 2.095(7) 2_655 ? 
Ni1 N10 2.112(8) 2_655 ? 
Ni1 N10 2.112(8) . ? 
Ni1 Cl1 2.375(4) . ? 
Ni1 Ni2 2.389(2) . ? 
Ni2 N2 1.910(8) . ? 
Ni2 N2 1.910(8) 2_655 ? 
Ni2 N9 1.914(8) 2_655 ? 
Ni2 N9 1.914(8) . ? 
Ni2 Ni3 2.304(2) . ? 
Ni3 N8 1.901(7) . ? 
Ni3 N8 1.901(7) 2_655 ? 
Ni3 N3 1.907(7) . ? 
Ni3 N3 1.907(7) 2_655 ? 
Ni3 Ni4 2.304(2) . ? 
Ni4 N4 1.881(8) . ? 
Ni4 N4 1.881(8) 2_655 ? 
Ni4 N7 1.891(8) . ? 
Ni4 N7 1.891(8) 2_655 ? 
Ni4 Ni5 2.383(2) . ? 
Ni5 N6 2.113(8) . ? 
Ni5 N6 2.113(8) 2_655 ? 
Ni5 N5 2.122(8) . ? 
Ni5 N5 2.122(8) 2_655 ? 
Ni5 Cl2 2.369(3) . ? 
N1 C5 1.335(12) . ? 
N1 C7 1.364(12) . ? 
N2 C7 1.397(12) . ? 
N2 C8 1.397(11) . ? 
N3 C12 1.352(11) . ? 
N3 C8 1.356(11) . ? 
N4 C13 1.397(12) . ? 
N4 C12 1.402(11) . ? 
N5 C17 1.335(12) . ? 
N5 C13 1.349(12) . ? 
N6 C24 1.333(12) . ? 
N6 C26 1.351(12) . ? 
N7 C26 1.394(12) . ? 
N7 C27 1.399(12) . ? 
N8 C31 1.352(11) . ? 
N8 C27 1.365(12) . ? 
N9 C31 1.370(12) . ? 
N9 C32 1.394(12) . ? 
N10 C36 1.333(12) . ? 
N10 C32 1.367(12) . ? 
C1 C2 1.483(17) . ? 
C2 C3 1.530(14) . ? 
C3 C6 1.370(14) . ? 
C3 C4 1.379(14) . ? 
C4 C5 1.368(14) . ? 
C6 C7 1.410(13) . ? 
C8 C9 1.385(13) . ? 
C9 C10 1.370(13) . ? 
C10 C11 1.392(13) . ? 
C11 C12 1.408(12) . ? 
C13 C14 1.410(14) . ? 
C14 C15 1.377(13) . ? 
C15 C16 1.388(14) . ? 
C15 C18 1.512(13) . ? 
C16 C17 1.354(15) . ? 
C18 C19A 1.507(19) . ? 
C18 C19 1.51(2) . ? 
C18 C19B 1.518(19) . ? 
C20 C21 1.459(16) . ? 
C21 C22 1.523(16) . ? 
C22 C25 1.374(14) . ? 
C22 C23 1.389(16) . ? 
C23 C24 1.346(16) . ? 
C25 C26 1.407(14) . ? 
C27 C28 1.397(14) . ? 
C28 C29 1.382(13) . ? 
C29 C30 1.346(13) . ? 
C30 C31 1.407(14) . ? 
C32 C33 1.420(14) . ? 
C33 C34 1.365(13) . ? 
C34 C35 1.384(15) . ? 
C34 C37 1.518(18) . ? 
C34 C37' 1.52(2) . ? 
C35 C36 1.366(15) . ? 
C37 C38 1.50(3) . ? 
C37' C38' 1.50(4) . ? 
Cl1S C1S 1.741(8) . ? 
C1S Cl3S 1.746(8) . ? 
C1S Cl2S 1.749(8) . ? 
Cl4S C2S 1.745(10) . ? 
C2S Cl6S 1.743(10) . ? 
C2S Cl5S 1.762(10) . ? 
Cl4B C2SB 1.743(12) . ? 
C2SB Cl6B 1.752(12) . ? 
C2SB Cl5B 1.758(12) . ? 
Cl7S C3S 1.742(12) . ? 
C3S Cl9S 1.748(12) . ? 
C3S Cl8S 1.753(12) . ? 
Cl7B C3SB 1.737(11) . ? 
C3SB Cl8B 1.748(11) . ? 
C3SB Cl9B 1.749(11) . ?  
Cl7C C3SC 1.741(8) . ? 
C3SC Cl7C 1.741(9) 2_755 ? 
C3SC Cl9C 1.746(8) . ? 
C3SC Cl9C 1.746(8) 2_755 ? 
C3SC Cl8C 1.749(8) . ? 
C3SC Cl8C 1.749(8) 2_755 ?   
 
loop_ 
 _geom_angle_atom_site_label_1 
 _geom_angle_atom_site_label_2 
 _geom_angle_atom_site_label_3 
 _geom_angle 
 _geom_angle_site_symmetry_1 
 _geom_angle_site_symmetry_3 
 _geom_angle_publ_flag 
N1 Ni1 N1 165.2(4) . 2_655 ? 
N1 Ni1 N10 89.3(3) . 2_655 ? 
N1 Ni1 N10 88.8(3) 2_655 2_655 ? 
N1 Ni1 N10 88.8(3) . . ? 
N1 Ni1 N10 89.3(3) 2_655 . ? 
N10 Ni1 N10 165.6(4) 2_655 . ? 
N1 Ni1 Cl1 97.4(2) . . ? 
N1 Ni1 Cl1 97.4(2) 2_655 . ? 
N10 Ni1 Cl1 97.20(19) 2_655 . ? 
N10 Ni1 Cl1 97.20(19) . . ? 
N1 Ni1 Ni2 82.6(2) . . ? 
N1 Ni1 Ni2 82.6(2) 2_655 . ? 
N10 Ni1 Ni2 82.80(19) 2_655 . ? 
N10 Ni1 Ni2 82.80(19) . . ? 
Cl1 Ni1 Ni2 180.0 . . ? 
N2 Ni2 N2 174.6(5) . 2_655 ? 
N2 Ni2 N9 90.2(3) . 2_655 ? 
N2 Ni2 N9 89.5(3) 2_655 2_655 ? 
N2 Ni2 N9 89.5(3) . . ? 
N2 Ni2 N9 90.2(3) 2_655 . ? 
N9 Ni2 N9 173.9(5) 2_655 . ? 
N2 Ni2 Ni3 87.3(2) . . ? 
N2 Ni2 Ni3 87.3(2) 2_655 . ? 
N9 Ni2 Ni3 86.9(2) 2_655 . ? 
N9 Ni2 Ni3 86.9(2) . . ? 
N2 Ni2 Ni1 92.7(2) . . ? 
N2 Ni2 Ni1 92.7(2) 2_655 . ? 
N9 Ni2 Ni1 93.1(2) 2_655 . ? 
N9 Ni2 Ni1 93.1(2) . . ? 
Ni3 Ni2 Ni1 180.0 . . ? 
N8 Ni3 N8 179.7(4) . 2_655 ? 
N8 Ni3 N3 90.1(3) . . ? 
N8 Ni3 N3 89.9(3) 2_655 . ? 
N8 Ni3 N3 89.9(3) . 2_655 ? 
N8 Ni3 N3 90.1(3) 2_655 2_655 ? 
N3 Ni3 N3 180.0(4) . 2_655 ? 
N8 Ni3 Ni4 90.1(2) . . ? 
N8 Ni3 Ni4 90.1(2) 2_655 . ? 
N3 Ni3 Ni4 90.0(2) . . ? 
N3 Ni3 Ni4 90.0(2) 2_655 . ? 
N8 Ni3 Ni2 89.9(2) . . ? 
N8 Ni3 Ni2 89.9(2) 2_655 . ? 
N3 Ni3 Ni2 90.0(2) . . ? 
N3 Ni3 Ni2 90.0(2) 2_655 . ? 
Ni4 Ni3 Ni2 180.0 . . ? 
N4 Ni4 N4 175.9(5) . 2_655 ? 
N4 Ni4 N7 89.9(4) . . ? 
N4 Ni4 N7 89.9(4) 2_655 . ? 
N4 Ni4 N7 89.9(4) . 2_655 ? 
N4 Ni4 N7 89.9(4) 2_655 2_655 ? 
N7 Ni4 N7 175.1(5) . 2_655 ? 
N4 Ni4 Ni3 88.0(2) . . ? 
N4 Ni4 Ni3 88.0(2) 2_655 . ? 
N7 Ni4 Ni3 87.6(2) . . ? 
N7 Ni4 Ni3 87.6(2) 2_655 . ? 
N4 Ni4 Ni5 92.0(2) . . ? 
N4 Ni4 Ni5 92.0(2) 2_655 . ? 
N7 Ni4 Ni5 92.4(2) . . ? 
N7 Ni4 Ni5 92.4(2) 2_655 . ? 
Ni3 Ni4 Ni5 180.0 . . ? 
N6 Ni5 N6 165.4(4) . 2_655 ? 
N6 Ni5 N5 90.9(3) . . ? 
N6 Ni5 N5 87.0(3) 2_655 . ? 
N6 Ni5 N5 87.0(3) . 2_655 ? 
N6 Ni5 N5 90.9(3) 2_655 2_655 ? 
N5 Ni5 N5 164.0(4) . 2_655 ? 
N6 Ni5 Cl2 97.3(2) . . ? 
N6 Ni5 Cl2 97.3(2) 2_655 . ? 
N5 Ni5 Cl2 98.0(2) . . ? 
N5 Ni5 Cl2 98.0(2) 2_655 . ? 
N6 Ni5 Ni4 82.7(2) . . ? 
N6 Ni5 Ni4 82.7(2) 2_655 . ? 
N5 Ni5 Ni4 82.0(2) . . ? 
N5 Ni5 Ni4 82.0(2) 2_655 . ? 
Cl2 Ni5 Ni4 180.0 . . ? 
C5 N1 C7 117.6(8) . . ? 
C5 N1 Ni1 119.7(6) . . ? 
C7 N1 Ni1 122.7(6) . . ? 
C7 N2 C8 123.4(8) . . ? 
C7 N2 Ni2 117.7(6) . . ? 
C8 N2 Ni2 118.9(6) . . ? 
C12 N3 C8 121.1(7) . . ? 
C12 N3 Ni3 118.8(6) . . ? 
C8 N3 Ni3 120.1(6) . . ? 
C13 N4 C12 123.1(8) . . ? 
C13 N4 Ni4 117.3(6) . . ? 
C12 N4 Ni4 118.9(6) . . ? 
C17 N5 C13 117.6(9) . . ? 
C17 N5 Ni5 121.1(7) . . ? 
C13 N5 Ni5 121.1(6) . . ? 
C24 N6 C26 117.8(9) . . ? 
C24 N6 Ni5 121.3(7) . . ? 
C26 N6 Ni5 120.9(6) . . ? 
C26 N7 C27 123.7(9) . . ? 
C26 N7 Ni4 117.6(7) . . ? 
C27 N7 Ni4 118.6(6) . . ? 
C31 N8 C27 120.5(8) . . ? 
C31 N8 Ni3 120.0(6) . . ? 
C27 N8 Ni3 119.4(6) . . ? 
C31 N9 C32 123.6(8) . . ? 
C31 N9 Ni2 119.9(6) . . ? 
C32 N9 Ni2 116.3(6) . . ? 
C36 N10 C32 117.7(9) . . ? 
C36 N10 Ni1 121.1(7) . . ? 
C32 N10 Ni1 121.2(6) . . ? 
C1 C2 C3 113.5(10) . . ? 
C6 C3 C4 118.9(9) . . ? 
C6 C3 C2 120.1(10) . . ? 
C4 C3 C2 121.0(9) . . ? 
C5 C4 C3 118.7(9) . . ? 
N1 C5 C4 124.3(9) . . ? 
C3 C6 C7 119.9(10) . . ? 
N1 C7 N2 115.1(8) . . ? 
N1 C7 C6 120.4(9) . . ? 
N2 C7 C6 124.3(9) . . ? 
N3 C8 C9 120.5(8) . . ? 
N3 C8 N2 114.7(8) . . ? 
C9 C8 N2 124.7(9) . . ? 
C10 C9 C8 118.8(9) . . ? 
C9 C10 C11 121.6(9) . . ? 
C10 C11 C12 117.3(9) . . ? 
N3 C12 N4 116.3(8) . . ? 
N3 C12 C11 120.4(8) . . ? 
N4 C12 C11 123.1(9) . . ? 
N5 C13 N4 115.1(9) . . ? 
N5 C13 C14 120.1(9) . . ? 
N4 C13 C14 124.2(9) . . ? 
C15 C14 C13 121.4(9) . . ? 
C14 C15 C16 115.9(9) . . ? 
C14 C15 C18 121.0(10) . . ? 
C16 C15 C18 123.0(10) . . ? 
C17 C16 C15 120.5(10) . . ? 
N5 C17 C16 124.1(10) . . ? 
C19A C18 C19 27(5) . . ? 
C19A C18 C15 111(2) . . ? 
C19 C18 C15 107(5) . . ? 
C19A C18 C19B 130(3) . . ? 
C19 C18 C19B 145(5) . . ? 
C15 C18 C19B 108.0(19) . . ? 
C20 C21 C22 105.5(14) . . ? 
C25 C22 C23 115.9(11) . . ? 
C25 C22 C21 120.2(11) . . ? 
C23 C22 C21 123.9(10) . . ? 
C24 C23 C22 121.2(10) . . ? 
N6 C24 C23 123.4(11) . . ? 
C22 C25 C26 121.0(10) . . ? 
N6 C26 N7 116.2(9) . . ? 
N6 C26 C25 120.3(9) . . ? 
N7 C26 C25 123.2(9) . . ? 
N8 C27 C28 120.4(9) . . ? 
N8 C27 N7 115.1(9) . . ? 
C28 C27 N7 124.4(9) . . ? 
C29 C28 C27 117.9(9) . . ? 
C30 C29 C28 121.7(9) . . ? 
C29 C30 C31 119.2(9) . . ? 
N8 C31 N9 115.2(9) . . ? 
N8 C31 C30 119.8(9) . . ? 
N9 C31 C30 125.0(9) . . ? 
N10 C32 N9 116.6(8) . . ? 
N10 C32 C33 120.6(9) . . ? 
N9 C32 C33 122.8(9) . . ? 
C34 C33 C32 119.9(10) . . ? 
C33 C34 C35 117.8(10) . . ? 
C33 C34 C37 118(3) . . ? 
C35 C34 C37 124(3) . . ? 
C33 C34 C37' 127(9) . . ? 
C35 C34 C37' 115(9) . . ? 
C37 C34 C37' 11(10) . . ? 
C36 C35 C34 120.3(10) . . ? 
N10 C36 C35 123.3(10) . . ? 
C38 C37 C34 112(2) . . ? 
C38' C37' C34 109(6) . . ? 
Cl1S C1S Cl3S 110.5(5) . . ? 
Cl1S C1S Cl2S 111.0(5) . . ? 
Cl3S C1S Cl2S 109.7(5) . . ? 
Cl9C Cl3S C1S 156(2) 3_455 . ? 
Cl6S C2S Cl4S 109.0(12) . . ? 
Cl6S C2S Cl5S 105.6(9) . . ? 
Cl4S C2S Cl5S 108.2(9) . . ? 
Cl4B C2SB Cl6B 108.4(13) . . ? 
Cl4B C2SB Cl5B 108.7(12) . . ? 
Cl6B C2SB Cl5B 104.2(11) . . ? 
Cl7S C3S Cl9S 109.9(13) . . ? 
Cl7S C3S Cl8S 108.9(12) . . ? 
Cl9S C3S Cl8S 106.9(12) . . ? 
Cl7B C3SB Cl8B 108.3(9) . . ? 
Cl7B C3SB Cl9B 106.7(9) . . ? 
Cl8B C3SB Cl9B 110.1(10) . . ? 
Cl8C Cl7C C3SC 88(4) 2_755 . ? 
Cl7C C3SC Cl7C 114(6) . 2_755 ? 
Cl7C C3SC Cl9C 110.5(6) . . ? 
Cl7C C3SC Cl9C 102(3) 2_755 . ? 
Cl7C C3SC Cl9C 102(3) . 2_755 ? 
Cl7C C3SC Cl9C 110.5(6) 2_755 2_755 ? 
Cl9C C3SC Cl9C 118(4) . 2_755 ? 
Cl7C C3SC Cl8C 111.0(6) . . ? 
Cl9C C3SC Cl8C 109.7(5) . . ? 
Cl9C C3SC Cl8C 105(3) 2_755 . ? 
Cl7C C3SC Cl8C 111.0(6) 2_755 2_755 ? 
Cl9C C3SC Cl8C 105(3) . 2_755 ? 
Cl9C C3SC Cl8C 109.7(5) 2_755 2_755 ? 
Cl8C C3SC Cl8C 109(6) . 2_755 ? 
 
_diffrn_measured_fraction_theta_max    0.990 
_diffrn_reflns_theta_full              22.50 
_diffrn_measured_fraction_theta_full   0.990 
_refine_diff_density_max    1.069 
_refine_diff_density_min   -1.238 
_refine_diff_density_rms    0.125 


#===END of Compound 1.6Dichloromethane================


#========================================================
#Compound 2.4Acetone
#========================================================

data_datam 
 
_audit_creation_method            SHELXL-97 
_chemical_name_systematic 
; 
 ? 
; 
_chemical_name_common             'Ni5(etda)4(PF6)3 4Acetone' 
_chemical_melting_point           'Not measured' 
_chemical_formula_moiety           'C88 H100 F18 N20 Ni5 O4 P3' 
_chemical_formula_sum 
 'C88 H100 F18 N20 Ni5 O4 P3' 
_chemical_formula_weight          2230.34 
 
loop_ 
 _atom_type_symbol 
 _atom_type_description 
 _atom_type_scat_dispersion_real 
 _atom_type_scat_dispersion_imag 
 _atom_type_scat_source 
 'C'  'C'   0.0033   0.0016 
 'International Tables Vol C Tables 4.2.6.8 and 6.1.1.4' 
 'H'  'H'   0.0000   0.0000 
 'International Tables Vol C Tables 4.2.6.8 and 6.1.1.4' 
 'N'  'N'   0.0061   0.0033 
 'International Tables Vol C Tables 4.2.6.8 and 6.1.1.4' 
 'F'  'F'   0.0171   0.0103 
 'International Tables Vol C Tables 4.2.6.8 and 6.1.1.4' 
 'P'  'P'   0.1023   0.0942 
 'International Tables Vol C Tables 4.2.6.8 and 6.1.1.4' 
 'Ni'  'Ni'   0.3393   1.1124 
 'International Tables Vol C Tables 4.2.6.8 and 6.1.1.4' 
 'O'  'O'   0.0106   0.0060 
 'International Tables Vol C Tables 4.2.6.8 and 6.1.1.4' 
 
_symmetry_cell_setting            Tetragonal 
_symmetry_space_group_name_H-M    I4 
 
loop_ 
 _symmetry_equiv_pos_as_xyz 
 'x, y, z' 
 '-x, -y, z' 
 '-y, x, z' 
 'y, -x, z' 
 'x+1/2, y+1/2, z+1/2' 
 '-x+1/2, -y+1/2, z+1/2' 
 '-y+1/2, x+1/2, z+1/2' 
 'y+1/2, -x+1/2, z+1/2' 
 
_cell_length_a                    16.3605(4) 
_cell_length_b                    16.3605(4) 
_cell_length_c                    17.7836(10) 
_cell_angle_alpha                 90.00 
_cell_angle_beta                  90.00 
_cell_angle_gamma                 90.00 
_cell_volume                      4760.1(3) 
_cell_formula_units_Z             2 
_cell_measurement_temperature     213(2) 
_cell_measurement_reflns_used     8844
_cell_measurement_theta_min       4.2905 
_cell_measurement_theta_max       27.484
 
_exptl_crystal_description        block 
_exptl_crystal_colour             black-green 
_exptl_crystal_size_max           0.50 
_exptl_crystal_size_mid           0.43 
_exptl_crystal_size_min           0.26 
_exptl_crystal_density_meas       'not measured' 
_exptl_crystal_density_diffrn     1.556 
_exptl_crystal_density_method     'not measured' 
_exptl_crystal_F_000              2294 
_exptl_absorpt_coefficient_mu     1.118 
_exptl_absorpt_correction_type    multi-scan
_exptl_absorpt_correction_T_min   0.6049 
_exptl_absorpt_correction_T_max   0.7598 
_exptl_absorpt_process_details    'SADABS V2.03'
 
_exptl_special_details 
; 
 ? 
; 
 
_diffrn_ambient_temperature       213(2) 
_diffrn_radiation_wavelength      0.71073 
_diffrn_radiation_type            MoK\a 
_diffrn_radiation_source          'normal-focus sealed tube' 
_diffrn_radiation_monochromator   graphite 
_diffrn_measurement_device_type    'Brucker SMART 1000' 
_diffrn_measurement_method        'Omega Scan'  
_diffrn_detector_area_resol_mean    ' 8.33 mm^-1^'
_diffrn_standards_number          'none (area detector)' 
_diffrn_standards_interval_count  ? 
_diffrn_standards_interval_time   ? 
_diffrn_standards_decay_%         ? 
_diffrn_reflns_number             14975 
_diffrn_reflns_av_R_equivalents   0.0239 
_diffrn_reflns_av_sigmaI/netI     0.0213 
_diffrn_reflns_limit_h_min        -21 
_diffrn_reflns_limit_h_max        21 
_diffrn_reflns_limit_k_min        -20 
_diffrn_reflns_limit_k_max        21 
_diffrn_reflns_limit_l_min        -10 
_diffrn_reflns_limit_l_max        22 
_diffrn_reflns_theta_min          1.69 
_diffrn_reflns_theta_max          27.52 
_reflns_number_total              3905 
_reflns_number_gt                 3442 
_reflns_threshold_expression      >2sigma(I) 
 
_computing_data_collection         'SMART V.5618'  
_computing_cell_refinement         'SAINT V. 6.22' 
_computing_data_reduction          'SAINT V. 6.22' 
_computing_structure_solution     'SHELXS-97 (Sheldrick, 1990)' 
_computing_structure_refinement   'SHELXL-97 (Sheldrick, 1997)' 
_computing_molecular_graphics     'SHELXTL (siemens, 1996)' 
_computing_publication_material   CIFTAB
 
_refine_special_details 
; 
 Refinement of F^2^ against ALL reflections.  The weighted R-factor wR and 
 goodness of fit S are based on F^2^, conventional R-factors R are based 
 on F, with F set to zero for negative F^2^. The threshold expression of 
 F^2^ > 2sigma(F^2^) is used only for calculating R-factors(gt) etc. and is 
 not relevant to the choice of reflections for refinement.  R-factors based 
 on F^2^ are statistically about twice as large as those based on F, and R- 
 factors based on ALL data will be even larger. 
; 
 
_refine_ls_structure_factor_coef  Fsqd  
_refine_ls_matrix_type            full 
_refine_ls_weighting_scheme       calc  
_refine_ls_weighting_details 
 'calc w=1/[\s^2^(Fo^2^)+(0.0781P)^2^+5.8906P] where P=(Fo^2^+2Fc^2^)/3' 
_atom_sites_solution_primary      direct 
_atom_sites_solution_secondary    difmap 
_atom_sites_solution_hydrogens    geom 
_refine_ls_hydrogen_treatment     noref 
_refine_ls_extinction_method      none 
_refine_ls_extinction_coef        ? 
_refine_ls_abs_structure_details 
 'Flack H D (1983), Acta Cryst. A39, 876-881' 
_refine_ls_abs_structure_Flack    0.68(3) 
_refine_ls_number_reflns          3905 
_refine_ls_number_parameters      300 
_refine_ls_number_restraints      1 
_refine_ls_R_factor_all           0.0496 
_refine_ls_R_factor_gt            0.0407 
_refine_ls_wR_factor_ref          0.1259 
_refine_ls_wR_factor_gt           0.1139 
_refine_ls_goodness_of_fit_ref    1.068 
_refine_ls_restrained_S_all       1.068 
_refine_ls_shift/su_max           0.000 
_refine_ls_shift/su_mean          0.000 
 
loop_ 
 _atom_site_label 
 _atom_site_type_symbol 
 _atom_site_fract_x 
 _atom_site_fract_y 
 _atom_site_fract_z 
 _atom_site_U_iso_or_equiv 
 _atom_site_adp_type 
 _atom_site_occupancy 
 _atom_site_symmetry_multiplicity 
 _atom_site_calc_flag 
 _atom_site_refinement_flags 
 _atom_site_disorder_assembly 
 _atom_site_disorder_group 
Ni2 Ni 0.0000 0.0000 0.06313(7) 0.0252(2) Uani 1 4 d S . . 
Ni3 Ni 0.0000 0.0000 -0.06242(8) 0.02211(19) Uani 1 4 d S . . 
Ni1 Ni 0.0000 0.0000 0.19183(6) 0.0291(3) Uani 1 4 d S . . 
Ni4 Ni 0.0000 0.0000 -0.18811(7) 0.0235(2) Uani 1 4 d S . . 
Ni5 Ni 0.0000 0.0000 -0.31700(6) 0.0277(3) Uani 1 4 d S . . 
N1 N 0.1083(2) -0.0465(2) 0.1851(2) 0.0322(8) Uani 1 1 d . . . 
N2 N 0.07834(19) -0.08374(19) 0.0622(2) 0.0305(7) Uani 1 1 d . . . 
N3 N 0.04395(16) -0.10831(15) -0.0621(2) 0.0261(5) Uani 1 1 d . . . 
N4 N 0.00312(19) -0.11663(18) -0.1870(2) 0.0285(6) Uani 1 1 d . . . 
N5 N -0.0342(2) -0.1113(2) -0.3122(2) 0.0316(8) Uani 1 1 d . . . 
C1 C 0.3551(4) -0.2252(4) 0.1752(5) 0.077(2) Uani 1 1 d . . . 
H1A H 0.4107 -0.2449 0.1704 0.116 Uiso 1 1 calc R . . 
H1B H 0.3216 -0.2491 0.1359 0.116 Uiso 1 1 calc R . . 
H1C H 0.3335 -0.2406 0.2240 0.116 Uiso 1 1 calc R . . 
C2 C 0.3542(3) -0.1366(4) 0.1680(4) 0.0530(14) Uani 1 1 d . . . 
H2A H 0.3768 -0.1209 0.1191 0.064 Uiso 1 1 calc R . . 
H2B H 0.3886 -0.1124 0.2073 0.064 Uiso 1 1 calc R . . 
C3 C 0.2682(3) -0.1042(3) 0.1751(3) 0.0424(11) Uani 1 1 d . . . 
C4 C 0.2402(3) -0.0648(3) 0.2399(3) 0.0472(12) Uani 1 1 d . . . 
H4A H 0.2750 -0.0577 0.2814 0.057 Uiso 1 1 calc R . . 
C5 C 0.1613(3) -0.0367(3) 0.2424(3) 0.0430(11) Uani 1 1 d . . . 
H5A H 0.1434 -0.0094 0.2859 0.052 Uiso 1 1 calc R . . 
C6 C 0.1342(2) -0.0840(2) 0.1202(3) 0.0305(8) Uani 1 1 d . . . 
C7 C 0.2139(3) -0.1139(3) 0.1152(3) 0.0385(10) Uani 1 1 d . . . 
H7A H 0.2312 -0.1406 0.0712 0.046 Uiso 1 1 calc R . . 
C8 C 0.0793(2) -0.1375(2) 0.0022(3) 0.0295(7) Uani 1 1 d . . . 
C9 C 0.1082(3) -0.2170(2) 0.0046(3) 0.0393(9) Uani 1 1 d . . . 
H9A H 0.1314 -0.2382 0.0489 0.047 Uiso 1 1 calc R . . 
C10 C 0.1021(3) -0.2647(2) -0.0592(3) 0.0415(10) Uani 1 1 d . . . 
H10A H 0.1211 -0.3189 -0.0580 0.050 Uiso 1 1 calc R . . 
C11 C 0.0686(2) -0.2343(2) -0.1250(3) 0.0368(9) Uani 1 1 d . . . 
H11A H 0.0672 -0.2665 -0.1687 0.044 Uiso 1 1 calc R . . 
C12 C 0.0370(2) -0.1555(2) -0.1253(3) 0.0279(7) Uani 1 1 d . . . 
C13 C -0.0620(3) -0.2361(2) -0.2474(3) 0.0339(9) Uani 1 1 d . . . 
H13A H -0.0625 -0.2661 -0.2023 0.041 Uiso 1 1 calc R . . 
C14 C -0.0295(2) -0.1565(2) -0.2475(3) 0.0283(8) Uani 1 1 d . . . 
C15 C -0.0657(3) -0.1462(3) -0.3751(3) 0.0378(10) Uani 1 1 d . . . 
H15A H -0.0688 -0.1145 -0.4191 0.045 Uiso 1 1 calc R . . 
C16 C -0.0927(3) -0.2238(3) -0.3776(3) 0.0430(11) Uani 1 1 d . . . 
H16A H -0.1111 -0.2464 -0.4232 0.052 Uiso 1 1 calc R . . 
C17 C -0.0930(3) -0.2708(3) -0.3112(3) 0.0380(11) Uani 1 1 d . . . 
C18 C -0.1291(4) -0.3563(3) -0.3119(3) 0.0484(13) Uani 1 1 d . . . 
H18A H -0.1883 -0.3525 -0.3195 0.058 Uiso 1 1 calc R . . 
H18B H -0.1196 -0.3820 -0.2629 0.058 Uiso 1 1 calc R . . 
C19 C -0.0928(4) -0.4104(3) -0.3731(4) 0.0674(18) Uani 1 1 d . . . 
H19A H -0.1177 -0.4641 -0.3709 0.101 Uiso 1 1 calc R . . 
H19B H -0.0343 -0.4154 -0.3654 0.101 Uiso 1 1 calc R . . 
H19C H -0.1031 -0.3861 -0.4219 0.101 Uiso 1 1 calc R . . 
P1 P 0.0000 0.0000 0.42724(19) 0.0447(6) Uani 1 4 d S . . 
P2 P 0.0000 0.5000 -0.13214(18) 0.0546(5) Uani 1 2 d S . . 
F1 F 0.0000 0.0000 0.3346(4) 0.0571(18) Uani 1 4 d S . . 
F2 F 0.0000 0.0000 0.5168(5) 0.071(2) Uani 1 4 d S . . 
F3 F 0.0575(2) 0.0790(2) 0.4267(3) 0.0798(11) Uani 1 1 d . . . 
F6 F -0.0430(3) 0.5861(2) -0.1327(4) 0.1138(18) Uani 1 1 d . . . 
F7 F 0.0000 0.5000 -0.0484(5) 0.178(6) Uani 1 2 d S . . 
F5 F 0.0846(3) 0.5422(3) -0.1342(6) 0.143(3) Uani 1 1 d . . . 
F4 F 0.0000 0.5000 -0.2234(6) 0.155(4) Uani 1 2 d S . . 
C3S C 0.2434(4) 0.1454(5) 0.4418(6) 0.0836(18) Uiso 1 1 d . . . 
O1S O 0.2298(5) 0.1969(5) 0.4922(5) 0.144(3) Uiso 1 1 d . . . 
C2S C 0.2458(7) 0.1672(7) 0.3626(8) 0.130(3) Uiso 1 1 d . . . 
H2SA H 0.2330 0.2248 0.3570 0.194 Uiso 1 1 calc R . . 
H2SB H 0.2059 0.1349 0.3353 0.194 Uiso 1 1 calc R . . 
H2SC H 0.2999 0.1565 0.3427 0.194 Uiso 1 1 calc R . . 
C1S C 0.2596(7) 0.0584(6) 0.4640(7) 0.118(3) Uiso 1 1 d . . . 
H1SA H 0.2583 0.0538 0.5183 0.177 Uiso 1 1 calc R . . 
H1SB H 0.3129 0.0420 0.4456 0.177 Uiso 1 1 calc R . . 
H1SC H 0.2180 0.0233 0.4424 0.177 Uiso 1 1 calc R . . 
 
loop_ 
 _atom_site_aniso_label 
 _atom_site_aniso_U_11 
 _atom_site_aniso_U_22 
 _atom_site_aniso_U_33 
 _atom_site_aniso_U_23 
 _atom_site_aniso_U_13 
 _atom_site_aniso_U_12 
Ni2 0.0244(3) 0.0244(3) 0.0269(6) 0.000 0.000 0.000 
Ni3 0.0205(2) 0.0205(2) 0.0254(5) 0.000 0.000 0.000 
Ni1 0.0293(4) 0.0293(4) 0.0289(7) 0.000 0.000 0.000 
Ni4 0.0228(3) 0.0228(3) 0.0251(6) 0.000 0.000 0.000 
Ni5 0.0269(4) 0.0269(4) 0.0292(7) 0.000 0.000 0.000 
N1 0.0342(19) 0.038(2) 0.025(2) -0.0033(14) -0.0027(14) 0.0007(15) 
N2 0.0312(15) 0.0312(15) 0.0290(18) -0.0038(14) -0.0056(14) 0.0022(12) 
N3 0.0271(12) 0.0249(12) 0.0263(15) -0.0005(16) -0.0029(16) 0.0014(9) 
N4 0.0307(14) 0.0249(14) 0.0298(17) 0.0019(13) -0.0076(14) -0.0013(12) 
N5 0.0316(17) 0.0302(17) 0.033(2) 0.0008(14) -0.0072(14) 0.0000(14) 
C1 0.055(4) 0.078(4) 0.098(6) 0.004(4) -0.014(3) 0.015(3) 
C2 0.034(2) 0.067(3) 0.058(4) -0.009(3) -0.016(2) 0.007(2) 
C3 0.038(2) 0.047(3) 0.043(3) -0.008(2) -0.009(2) 0.0033(19) 
C4 0.040(2) 0.065(3) 0.037(3) -0.010(2) -0.015(2) 0.003(2) 
C5 0.043(2) 0.054(3) 0.032(2) -0.007(2) -0.004(2) -0.001(2) 
C6 0.0326(19) 0.0292(19) 0.030(2) -0.0004(16) -0.0027(16) -0.0018(15) 
C7 0.036(2) 0.039(2) 0.040(3) -0.0051(19) -0.0063(19) 0.0059(17) 
C8 0.0294(16) 0.0298(17) 0.0293(19) -0.0006(17) -0.0023(17) 0.0007(13) 
C9 0.049(2) 0.0327(18) 0.036(2) 0.001(2) -0.012(2) 0.0074(16) 
C10 0.057(2) 0.0256(15) 0.042(2) -0.004(2) -0.016(3) 0.0103(15) 
C11 0.044(2) 0.0267(16) 0.040(2) -0.0097(18) -0.012(2) 0.0050(14) 
C12 0.0278(16) 0.0264(16) 0.030(2) -0.0016(16) -0.0072(17) -0.0014(12) 
C13 0.038(2) 0.0303(19) 0.033(2) 0.0017(16) -0.0041(17) -0.0066(17) 
C14 0.0294(18) 0.0264(17) 0.029(2) -0.0030(15) -0.0034(15) 0.0039(15) 
C15 0.045(2) 0.039(2) 0.029(2) 0.0010(18) -0.0092(19) -0.0034(19) 
C16 0.048(3) 0.044(3) 0.037(3) -0.007(2) -0.012(2) -0.002(2) 
C17 0.043(2) 0.031(2) 0.041(3) -0.0028(18) -0.0116(19) -0.0051(18) 
C18 0.062(3) 0.036(2) 0.047(3) 0.000(2) -0.014(2) -0.016(2) 
C19 0.068(4) 0.045(3) 0.089(5) -0.012(3) -0.012(3) -0.008(2) 
P1 0.0503(7) 0.0503(7) 0.0333(15) 0.000 0.000 0.000 
P2 0.0559(10) 0.0460(9) 0.0618(15) 0.000 0.000 -0.0053(7) 
F1 0.065(3) 0.065(3) 0.041(4) 0.000 0.000 0.000 
F2 0.081(3) 0.081(3) 0.050(5) 0.000 0.000 0.000 
F3 0.090(2) 0.0686(19) 0.081(3) 0.004(2) 0.000(2) -0.0266(17) 
F6 0.112(3) 0.062(2) 0.167(6) 0.011(3) -0.019(4) 0.016(2) 
F7 0.255(13) 0.213(10) 0.065(6) 0.000 0.000 0.116(9) 
F5 0.078(3) 0.094(3) 0.255(9) -0.006(4) 0.008(4) -0.025(2) 
F4 0.201(10) 0.191(9) 0.074(6) 0.000 0.000 0.044(7) 
 
_geom_special_details 
; 
 All esds (except the esd in the dihedral angle between two l.s. planes) 
 are estimated using the full covariance matrix.  The cell esds are taken 
 into account individually in the estimation of esds in distances, angles 
 and torsion angles; correlations between esds in cell parameters are only 
 used when they are defined by crystal symmetry.  An approximate (isotropic) 
 treatment of cell esds is used for estimating esds involving l.s. planes. 
; 
 
loop_ 
 _geom_bond_atom_site_label_1 
 _geom_bond_atom_site_label_2 
 _geom_bond_distance 
 _geom_bond_site_symmetry_2 
 _geom_bond_publ_flag 
Ni2 N2 1.876(3) 3 ? 
Ni2 N2 1.876(3) 4 ? 
Ni2 N2 1.876(3) . y 
Ni2 N2 1.876(3) 2 ? 
Ni2 Ni3 2.2328(15) . y 
Ni2 Ni1 2.2889(17) . y 
Ni3 N3 1.912(3) 3 ? 
Ni3 N3 1.912(3) 2 ? 
Ni3 N3 1.912(3) 4 ? 
Ni3 N3 1.912(3) . y 
Ni3 Ni4 2.2351(15) . y 
Ni1 N1 1.931(4) 3 ? 
Ni1 N1 1.931(4) 2 ? 
Ni1 N1 1.931(4) . y 
Ni1 N1 1.931(4) 4 ? 
Ni4 N4 1.909(3) 3 ? 
Ni4 N4 1.909(3) 2 ? 
Ni4 N4 1.909(3) . y 
Ni4 N4 1.909(3) 4 ? 
Ni4 Ni5 2.2921(17) . y 
Ni5 N5 1.907(4) 2 y 
Ni5 N5 1.907(4) . y 
Ni5 N5 1.907(4) 3 ? 
Ni5 N5 1.907(4) 4 ? 
N1 C5 1.347(6) . ? 
N1 C6 1.375(5) . ? 
N2 C6 1.378(5) . ? 
N2 C8 1.383(5) . ? 
N3 C8 1.367(6) . ? 
N3 C12 1.369(5) . ? 
N4 C14 1.368(5) . ? 
N4 C12 1.383(5) . ? 
N5 C15 1.356(6) . ? 
N5 C14 1.370(6) . ? 
C1 C2 1.455(9) . ? 
C2 C3 1.509(6) . ? 
C3 C7 1.396(7) . ? 
C3 C4 1.398(7) . ? 
C4 C5 1.370(7) . ? 
C6 C7 1.396(6) . ? 
C8 C9 1.384(5) . ? 
C9 C10 1.381(7) . ? 
C10 C11 1.384(7) . ? 
C11 C12 1.389(5) . ? 
C13 C17 1.367(6) . ? 
C13 C14 1.406(5) . ? 
C15 C16 1.345(7) . ? 
C16 C17 1.410(7) . ? 
C17 C18 1.519(6) . ? 
C18 C19 1.522(8) . ? 
P1 F2 1.592(10) . ? 
P1 F3 1.599(3) 4 ? 
P1 F3 1.599(3) . ? 
P1 F3 1.599(3) 3 ? 
P1 F3 1.599(3) 2 ? 
P1 F1 1.647(9) . ? 
P2 F7 1.489(10) . ? 
P2 F5 1.547(4) . ? 
P2 F5 1.547(4) 2_565 ? 
P2 F6 1.574(4) 2_565 ? 
P2 F6 1.574(4) . ? 
P2 F4 1.623(11) . ? 
C3S O1S 1.251(11) . ? 
C3S C2S 1.453(17) . ? 
C3S C1S 1.500(12) . ? 
 
loop_ 
 _geom_angle_atom_site_label_1 
 _geom_angle_atom_site_label_2 
 _geom_angle_atom_site_label_3 
 _geom_angle 
 _geom_angle_site_symmetry_1 
 _geom_angle_site_symmetry_3 
 _geom_angle_publ_flag 
N2 Ni2 N2 179.0(3) 3 4 ? 
N2 Ni2 N2 89.996(2) 3 . ? 
N2 Ni2 N2 89.996(2) 4 . ? 
N2 Ni2 N2 89.996(2) 3 2 ? 
N2 Ni2 N2 89.995(2) 4 2 ? 
N2 Ni2 N2 179.0(3) . 2 ? 
N2 Ni2 Ni3 89.49(13) 3 . ? 
N2 Ni2 Ni3 89.49(13) 4 . ? 
N2 Ni2 Ni3 89.49(13) . . ? 
N2 Ni2 Ni3 89.49(13) 2 . ? 
N2 Ni2 Ni1 90.51(13) 3 . ? 
N2 Ni2 Ni1 90.51(13) 4 . ? 
N2 Ni2 Ni1 90.51(13) . . ? 
N2 Ni2 Ni1 90.51(13) 2 . ? 
Ni3 Ni2 Ni1 180.0 . . ? 
N3 Ni3 N3 90.000(1) 3 2 ? 
N3 Ni3 N3 179.7(3) 3 4 ? 
N3 Ni3 N3 89.999(1) 2 4 ? 
N3 Ni3 N3 89.999(1) 3 . ? 
N3 Ni3 N3 179.7(3) 2 . ? 
N3 Ni3 N3 89.999(1) 4 . ? 
N3 Ni3 Ni2 89.83(14) 3 . ? 
N3 Ni3 Ni2 89.83(14) 2 . ? 
N3 Ni3 Ni2 89.83(14) 4 . ? 
N3 Ni3 Ni2 89.83(14) . . ? 
N3 Ni3 Ni4 90.17(14) 3 . ? 
N3 Ni3 Ni4 90.17(14) 2 . ? 
N3 Ni3 Ni4 90.17(14) 4 . ? 
N3 Ni3 Ni4 90.17(14) . . ? 
Ni2 Ni3 Ni4 180.0 . . ? 
N1 Ni1 N1 89.783(15) 3 2 ? 
N1 Ni1 N1 89.783(15) 3 . ? 
N1 Ni1 N1 172.9(2) 2 . ? 
N1 Ni1 N1 172.9(2) 3 4 ? 
N1 Ni1 N1 89.782(15) 2 4 ? 
N1 Ni1 N1 89.783(15) . 4 ? 
N1 Ni1 Ni2 86.47(12) 3 . ? 
N1 Ni1 Ni2 86.47(12) 2 . ? 
N1 Ni1 Ni2 86.47(12) . . ? 
N1 Ni1 Ni2 86.47(12) 4 . ? 
N4 Ni4 N4 89.993(3) 3 2 ? 
N4 Ni4 N4 89.993(3) 3 . ? 
N4 Ni4 N4 178.8(2) 2 . ? 
N4 Ni4 N4 178.8(2) 3 4 ? 
N4 Ni4 N4 89.993(3) 2 4 ? 
N4 Ni4 N4 89.993(3) . 4 ? 
N4 Ni4 Ni3 89.38(12) 3 . ? 
N4 Ni4 Ni3 89.38(12) 2 . ? 
N4 Ni4 Ni3 89.38(12) . . ? 
N4 Ni4 Ni3 89.38(12) 4 . ? 
N4 Ni4 Ni5 90.62(12) 3 . ? 
N4 Ni4 Ni5 90.62(12) 2 . ? 
N4 Ni4 Ni5 90.62(12) . . ? 
N4 Ni4 Ni5 90.62(12) 4 . ? 
Ni3 Ni4 Ni5 180.0 . . ? 
N5 Ni5 N5 174.9(2) 2 . ? 
N5 Ni5 N5 89.887(11) 2 3 ? 
N5 Ni5 N5 89.887(11) . 3 ? 
N5 Ni5 N5 89.887(11) 2 4 ? 
N5 Ni5 N5 89.887(11) . 4 ? 
N5 Ni5 N5 174.9(2) 3 4 ? 
N5 Ni5 Ni4 87.46(12) 2 . ? 
N5 Ni5 Ni4 87.46(12) . . ? 
N5 Ni5 Ni4 87.46(12) 3 . ? 
N5 Ni5 Ni4 87.46(12) 4 . ? 
C5 N1 C6 119.2(4) . . ? 
C5 N1 Ni1 119.9(3) . . ? 
C6 N1 Ni1 120.7(3) . . ? 
C6 N2 C8 124.6(3) . . ? 
C6 N2 Ni2 116.6(3) . . ? 
C8 N2 Ni2 118.6(3) . . ? 
C8 N3 C12 121.6(3) . . ? 
C8 N3 Ni3 119.0(3) . . ? 
C12 N3 Ni3 119.3(3) . . ? 
C14 N4 C12 124.1(3) . . ? 
C14 N4 Ni4 117.2(3) . . ? 
C12 N4 Ni4 118.6(3) . . ? 
C15 N5 C14 119.1(4) . . ? 
C15 N5 Ni5 118.4(3) . . ? 
C14 N5 Ni5 122.4(3) . . ? 
C1 C2 C3 110.6(5) . . ? 
C7 C3 C4 118.3(4) . . ? 
C7 C3 C2 119.3(5) . . ? 
C4 C3 C2 122.4(5) . . ? 
C5 C4 C3 119.3(5) . . ? 
N1 C5 C4 122.9(5) . . ? 
N1 C6 N2 115.0(3) . . ? 
N1 C6 C7 119.9(4) . . ? 
N2 C6 C7 124.9(4) . . ? 
C6 C7 C3 120.3(5) . . ? 
N3 C8 N2 114.7(3) . . ? 
N3 C8 C9 119.9(4) . . ? 
N2 C8 C9 125.3(4) . . ? 
C10 C9 C8 118.7(4) . . ? 
C9 C10 C11 121.3(3) . . ? 
C10 C11 C12 119.0(4) . . ? 
N3 C12 N4 115.1(3) . . ? 
N3 C12 C11 119.3(4) . . ? 
N4 C12 C11 125.4(4) . . ? 
C17 C13 C14 121.6(4) . . ? 
N4 C14 N5 115.2(3) . . ? 
N4 C14 C13 126.0(4) . . ? 
N5 C14 C13 118.7(4) . . ? 
C16 C15 N5 123.3(4) . . ? 
C15 C16 C17 119.2(4) . . ? 
C13 C17 C16 117.8(4) . . ? 
C13 C17 C18 122.3(4) . . ? 
C16 C17 C18 119.8(4) . . ? 
C17 C18 C19 112.9(5) . . ? 
F2 P1 F3 90.4(2) . 4 ? 
F2 P1 F3 90.4(2) . . ? 
F3 P1 F3 89.998(3) 4 . ? 
F2 P1 F3 90.4(2) . 3 ? 
F3 P1 F3 179.3(4) 4 3 ? 
F3 P1 F3 89.998(3) . 3 ? 
F2 P1 F3 90.4(2) . 2 ? 
F3 P1 F3 89.998(3) 4 2 ? 
F3 P1 F3 179.3(4) . 2 ? 
F3 P1 F3 89.997(3) 3 2 ? 
F2 P1 F1 180.000(1) . . ? 
F3 P1 F1 89.6(2) 4 . ? 
F3 P1 F1 89.6(2) . . ? 
F3 P1 F1 89.6(2) 3 . ? 
F3 P1 F1 89.6(2) 2 . ? 
F7 P2 F5 91.3(4) . . ? 
F7 P2 F5 91.3(4) . 2_565 ? 
F5 P2 F5 177.3(8) . 2_565 ? 
F7 P2 F6 90.4(3) . 2_565 ? 
F5 P2 F6 90.0(2) . 2_565 ? 
F5 P2 F6 90.0(2) 2_565 2_565 ? 
F7 P2 F6 90.4(3) . . ? 
F5 P2 F6 90.0(2) . . ? 
F5 P2 F6 90.0(2) 2_565 . ? 
F6 P2 F6 179.3(6) 2_565 . ? 
F7 P2 F4 180.000(1) . . ? 
F5 P2 F4 88.7(4) . . ? 
F5 P2 F4 88.7(4) 2_565 . ? 
F6 P2 F4 89.6(3) 2_565 . ? 
F6 P2 F4 89.6(3) . . ? 
O1S C3S C2S 122.3(8) . . ? 
O1S C3S C1S 118.8(10) . . ? 
C2S C3S C1S 118.9(9) . . ? 
 
_diffrn_measured_fraction_theta_max    0.997 
_diffrn_reflns_theta_full              27.52 
_diffrn_measured_fraction_theta_full   0.997 
_refine_diff_density_max    1.029 
_refine_diff_density_min   -0.746 
_refine_diff_density_rms    0.083 

#===END of Compound 2.4Acetone================


#========================================================
#H2etpda
#========================================================

 
data_xl 
 
_audit_creation_method            SHELXL-97 
_chemical_name_systematic 
; 
 ? 
; 
_chemical_name_common             ? 
_chemical_melting_point           'NOT MEASURED' 
_chemical_formula_moiety          'C19 H21 N5' 
_chemical_formula_sum 
 'C19 H21 N5' 
_chemical_formula_weight          319.41 
 
loop_ 
 _atom_type_symbol 
 _atom_type_description 
 _atom_type_scat_dispersion_real 
 _atom_type_scat_dispersion_imag 
 _atom_type_scat_source 
 'C'  'C'   0.0033   0.0016 
 'International Tables Vol C Tables 4.2.6.8 and 6.1.1.4' 
 'H'  'H'   0.0000   0.0000 
 'International Tables Vol C Tables 4.2.6.8 and 6.1.1.4' 
 'N'  'N'   0.0061   0.0033 
 'International Tables Vol C Tables 4.2.6.8 and 6.1.1.4' 
 
_symmetry_cell_setting            MONOCLINIC 
_symmetry_space_group_name_H-M    'P 2(1)/c' 
 
loop_ 
 _symmetry_equiv_pos_as_xyz 
 'x, y, z' 
 '-x, y+1/2, -z+1/2' 
 '-x, -y, -z' 
 'x, -y-1/2, z-1/2' 
 
_cell_length_a                    8.6996(6) 
_cell_length_b                    24.849(2) 
_cell_length_c                    7.9420(6) 
_cell_angle_alpha                 90.00 
_cell_angle_beta                  104.882(1) 
_cell_angle_gamma                 90.00 
_cell_volume                      1659.2(2) 
_cell_formula_units_Z             4 
_cell_measurement_temperature     213(2) 
_cell_measurement_reflns_used     3667 
_cell_measurement_theta_min       2.422 
_cell_measurement_theta_max       24.925 
 
_exptl_crystal_description        needle 
_exptl_crystal_colour             colorless 
_exptl_crystal_size_max           0.32 
_exptl_crystal_size_mid           0.15 
_exptl_crystal_size_min           0.12 
_exptl_crystal_density_meas       'not measured' 
_exptl_crystal_density_diffrn     1.279 
_exptl_crystal_density_method     'not measured' 
_exptl_crystal_F_000              680 
_exptl_absorpt_coefficient_mu     0.079 
_exptl_absorpt_correction_type    mutil-scan 
_exptl_absorpt_correction_T_min   0.9750 
_exptl_absorpt_correction_T_max   0.9905 
_exptl_absorpt_process_details    'SADABS V2.03' 
 
_exptl_special_details 
; 
 ? 
; 
 
_diffrn_ambient_temperature       213(2) 
_diffrn_radiation_wavelength      0.71073 
_diffrn_radiation_type            MoK\a 
_diffrn_radiation_source          'normal-focus sealed tube' 
_diffrn_radiation_monochromator   graphite 
_diffrn_measurement_device_type   'Bruker Smart 1000' 
_diffrn_measurement_method        '\w sacn' 
_diffrn_detector_area_resol_mean  '8.33 mm^-1^ 
_diffrn_standards_number          'none (area detector data)' 
_diffrn_standards_interval_count  ? 
_diffrn_standards_interval_time   ? 
_diffrn_standards_decay_%         ? 
_diffrn_reflns_number             8753 
_diffrn_reflns_av_R_equivalents   0.0177 
_diffrn_reflns_av_sigmaI/netI     0.0197 
_diffrn_reflns_limit_h_min        -10 
_diffrn_reflns_limit_h_max        9 
_diffrn_reflns_limit_k_min        -21 
_diffrn_reflns_limit_k_max        29 
_diffrn_reflns_limit_l_min        -8 
_diffrn_reflns_limit_l_max        9 
_diffrn_reflns_theta_min          2.42 
_diffrn_reflns_theta_max          25.04 
_reflns_number_total              2923 
_reflns_number_gt                 2287 
_reflns_threshold_expression     I>2sigma(I) 
 
_computing_data_collection        'SMART V. 5.618' 
_computing_cell_refinement        'SAINT V.6.22' 
_computing_data_reduction         'SAINT V. 6.22' 
_computing_structure_solution     'SHELXS-97 (Sheldrick, 1990)' 
_computing_structure_refinement   'SHELXL-97 (Sheldrick, 1997)' 
_computing_molecular_graphics     'SHELXTL (Simens, 1996)' 
_computing_publication_material   CIFTAB 
 
_refine_special_details 
; 
 Refinement of F^2^ against ALL reflections.  The weighted R-factor wR and 
 goodness of fit S are based on F^2^, conventional R-factors R are based 
 on F, with F set to zero for negative F^2^. The threshold expression of 
 F^2^ > 2sigma(F^2^) is used only for calculating R-factors(gt) etc. and is 
 not relevant to the choice of reflections for refinement.  R-factors based 
 on F^2^ are statistically about twice as large as those based on F, and R- 
 factors based on ALL data will be even larger. 
; 
 
_refine_ls_structure_factor_coef  Fsqd  
_refine_ls_matrix_type            full 
_refine_ls_weighting_scheme       calc  
_refine_ls_weighting_details 
 'calc w=1/[\s^2^(Fo^2^)+(0.0668P)^2^+0.8644P] where P=(Fo^2^+2Fc^2^)/3' 
_atom_sites_solution_primary      direct 
_atom_sites_solution_secondary    difmap 
_atom_sites_solution_hydrogens    geom 
_refine_ls_hydrogen_treatment     noref 
_refine_ls_extinction_method      none 
_refine_ls_extinction_coef        ? 
_refine_ls_number_reflns          2923 
_refine_ls_number_parameters      217 
_refine_ls_number_restraints      0 
_refine_ls_R_factor_all           0.0647 
_refine_ls_R_factor_gt            0.0498 
_refine_ls_wR_factor_ref          0.1427 
_refine_ls_wR_factor_gt           0.1289 
_refine_ls_goodness_of_fit_ref    1.029 
_refine_ls_restrained_S_all       1.029 
_refine_ls_shift/su_max           0.001 
_refine_ls_shift/su_mean          0.000 
 
loop_ 
 _atom_site_label 
 _atom_site_type_symbol 
 _atom_site_fract_x 
 _atom_site_fract_y 
 _atom_site_fract_z 
 _atom_site_U_iso_or_equiv 
 _atom_site_adp_type 
 _atom_site_occupancy 
 _atom_site_symmetry_multiplicity 
 _atom_site_calc_flag 
 _atom_site_refinement_flags 
 _atom_site_disorder_assembly 
 _atom_site_disorder_group 
N3 N 0.13852(18) 0.68018(6) 0.35807(19) 0.0336(4) Uani 1 1 d . . . 
N4 N 0.08175(19) 0.75328(6) 0.5153(2) 0.0371(4) Uani 1 1 d . . . 
H4A H 0.1251 0.7742 0.6023 0.045 Uiso 1 1 calc R . . 
N5 N -0.0621(2) 0.82723(7) 0.3949(2) 0.0434(4) Uani 1 1 d . . . 
N2 N 0.1747(2) 0.61016(6) 0.1874(2) 0.0427(4) Uani 1 1 d . . . 
H2A H 0.1153 0.6301 0.1064 0.051 Uiso 1 1 calc R . . 
C12 C 0.1511(2) 0.70334(7) 0.5131(2) 0.0328(4) Uani 1 1 d . . . 
C13 C -0.0500(2) 0.77370(8) 0.3933(2) 0.0356(4) Uani 1 1 d . . . 
C14 C -0.1640(2) 0.74090(9) 0.2854(2) 0.0396(5) Uani 1 1 d . . . 
H14A H -0.1521 0.7033 0.2900 0.047 Uiso 1 1 calc R . . 
C11 C 0.2349(2) 0.68030(8) 0.6695(2) 0.0382(5) Uani 1 1 d . . . 
H11A H 0.2417 0.6974 0.7767 0.046 Uiso 1 1 calc R . . 
C8 C 0.2057(2) 0.63143(8) 0.3544(2) 0.0363(4) Uani 1 1 d . . . 
C9 C 0.2940(3) 0.60616(8) 0.5043(3) 0.0433(5) Uani 1 1 d . . . 
H9A H 0.3431 0.5727 0.4988 0.052 Uiso 1 1 calc R . . 
C17 C -0.2945(2) 0.76406(10) 0.1716(3) 0.0454(5) Uani 1 1 d . . . 
C16 C -0.3031(3) 0.81972(10) 0.1675(3) 0.0535(6) Uani 1 1 d . . . 
H16A H -0.3870 0.8373 0.0882 0.064 Uiso 1 1 calc R . . 
N1 N 0.3294(3) 0.53175(8) 0.2404(2) 0.0610(6) Uani 1 1 d . . . 
C6 C 0.2237(3) 0.56208(8) 0.1297(3) 0.0421(5) Uani 1 1 d . . . 
C10 C 0.3071(2) 0.63179(8) 0.6614(3) 0.0438(5) Uani 1 1 d . . . 
H10A H 0.3667 0.6157 0.7646 0.053 Uiso 1 1 calc R . . 
C15 C -0.1880(3) 0.84879(10) 0.2804(3) 0.0532(6) Uani 1 1 d . . . 
H15A H -0.1975 0.8865 0.2776 0.064 Uiso 1 1 calc R . . 
C3 C 0.2027(3) 0.49969(9) -0.1067(3) 0.0506(6) Uani 1 1 d . . . 
C7 C 0.1599(3) 0.54750(8) -0.0434(3) 0.0460(5) Uani 1 1 d . . . 
H7A H 0.0869 0.5704 -0.1177 0.055 Uiso 1 1 calc R . . 
C2 C 0.1280(4) 0.48412(10) -0.2943(3) 0.0655(7) Uani 1 1 d . . . 
H2B H 0.0134 0.4797 -0.3088 0.079 Uiso 1 1 calc R . . 
H2C H 0.1423 0.5142 -0.3687 0.079 Uiso 1 1 calc R . . 
C18 C -0.4254(3) 0.72990(12) 0.0609(3) 0.0649(7) Uani 1 1 d . . . 
H18A H -0.5152 0.7537 0.0098 0.078 Uiso 1 1 calc R . . 
H18B H -0.3869 0.7154 -0.0356 0.078 Uiso 1 1 calc R . . 
C5 C 0.3701(4) 0.48550(10) 0.1761(4) 0.0752(9) Uani 1 1 d . . . 
H5B H 0.4440 0.4633 0.2523 0.090 Uiso 1 1 calc R . . 
C4 C 0.3126(4) 0.46811(10) 0.0087(3) 0.0680(8) Uani 1 1 d . . . 
H4B H 0.3469 0.4353 -0.0276 0.082 Uiso 1 1 calc R . . 
C19 C -0.4857(5) 0.68530(13) 0.1426(4) 0.0988(12) Uani 1 1 d . . . 
H19A H -0.5687 0.6670 0.0567 0.148 Uiso 1 1 calc R . . 
H19B H -0.5287 0.6987 0.2357 0.148 Uiso 1 1 calc R . . 
H19C H -0.3999 0.6603 0.1901 0.148 Uiso 1 1 calc R . . 
C1 C 0.1890(5) 0.43436(14) -0.3599(5) 0.1062(13) Uani 1 1 d . . . 
H1B H 0.1317 0.4284 -0.4804 0.159 Uiso 1 1 calc R . . 
H1C H 0.1735 0.4039 -0.2899 0.159 Uiso 1 1 calc R . . 
H1D H 0.3015 0.4385 -0.3522 0.159 Uiso 1 1 calc R . . 
 
loop_ 
 _atom_site_aniso_label 
 _atom_site_aniso_U_11 
 _atom_site_aniso_U_22 
 _atom_site_aniso_U_33 
 _atom_site_aniso_U_23 
 _atom_site_aniso_U_13 
 _atom_site_aniso_U_12 
N3 0.0370(9) 0.0332(9) 0.0291(8) -0.0001(6) 0.0061(7) -0.0008(7) 
N4 0.0404(9) 0.0373(9) 0.0298(8) -0.0062(7) 0.0021(7) 0.0016(7) 
N5 0.0503(10) 0.0437(10) 0.0351(9) 0.0006(7) 0.0091(8) 0.0086(8) 
N2 0.0585(11) 0.0341(9) 0.0317(9) -0.0003(7) 0.0049(8) 0.0069(8) 
C12 0.0309(9) 0.0361(10) 0.0306(9) -0.0014(8) 0.0067(7) -0.0043(8) 
C13 0.0379(10) 0.0428(11) 0.0271(10) -0.0006(8) 0.0102(8) 0.0038(8) 
C14 0.0366(11) 0.0497(12) 0.0326(10) -0.0019(9) 0.0095(8) -0.0010(9) 
C11 0.0403(11) 0.0451(11) 0.0279(10) -0.0011(8) 0.0064(8) -0.0002(9) 
C8 0.0417(11) 0.0338(10) 0.0324(10) -0.0003(8) 0.0079(8) -0.0020(8) 
C9 0.0523(12) 0.0366(11) 0.0385(11) 0.0035(9) 0.0070(9) 0.0066(9) 
C17 0.0358(11) 0.0726(15) 0.0287(10) 0.0038(10) 0.0103(8) 0.0006(10) 
C16 0.0477(13) 0.0744(17) 0.0370(12) 0.0115(11) 0.0082(10) 0.0178(11) 
N1 0.0843(15) 0.0467(11) 0.0462(11) -0.0025(9) 0.0064(10) 0.0213(10) 
C6 0.0555(13) 0.0316(10) 0.0403(11) 0.0008(8) 0.0143(9) -0.0009(9) 
C10 0.0493(12) 0.0472(12) 0.0314(10) 0.0069(9) 0.0040(9) 0.0057(9) 
C15 0.0616(15) 0.0540(14) 0.0426(12) 0.0066(10) 0.0111(11) 0.0177(11) 
C3 0.0726(15) 0.0350(11) 0.0484(13) -0.0048(10) 0.0229(11) -0.0064(10) 
C7 0.0599(13) 0.0375(11) 0.0401(11) -0.0009(9) 0.0118(10) -0.0003(10) 
C2 0.092(2) 0.0538(15) 0.0522(14) -0.0153(12) 0.0209(13) -0.0063(13) 
C18 0.0416(13) 0.110(2) 0.0393(13) 0.0042(13) 0.0029(10) -0.0155(13) 
C5 0.109(2) 0.0515(15) 0.0583(16) 0.0000(12) 0.0087(15) 0.0350(15) 
C4 0.107(2) 0.0402(13) 0.0580(15) -0.0054(11) 0.0243(15) 0.0155(13) 
C19 0.125(3) 0.088(2) 0.0582(18) 0.0063(16) -0.0221(18) -0.043(2) 
C1 0.129(3) 0.096(3) 0.082(2) -0.041(2) 0.006(2) 0.025(2) 
 
_geom_special_details 
; 
 All esds (except the esd in the dihedral angle between two l.s. planes) 
 are estimated using the full covariance matrix.  The cell esds are taken 
 into account individually in the estimation of esds in distances, angles 
 and torsion angles; correlations between esds in cell parameters are only 
 used when they are defined by crystal symmetry.  An approximate (isotropic) 
 treatment of cell esds is used for estimating esds involving l.s. planes. 
; 
 
loop_ 
 _geom_bond_atom_site_label_1 
 _geom_bond_atom_site_label_2 
 _geom_bond_distance 
 _geom_bond_site_symmetry_2 
 _geom_bond_publ_flag 
N3 C12 1.338(2) . ? 
N3 C8 1.348(2) . ? 
N4 C12 1.382(2) . ? 
N4 C13 1.393(2) . ? 
N5 C13 1.335(2) . ? 
N5 C15 1.343(3) . ? 
N2 C6 1.386(3) . ? 
N2 C8 1.388(2) . ? 
C12 C11 1.392(3) . ? 
C13 C14 1.395(3) . ? 
C14 C17 1.382(3) . ? 
C11 C10 1.368(3) . ? 
C8 C9 1.390(3) . ? 
C9 C10 1.379(3) . ? 
C17 C16 1.385(3) . ? 
C17 C18 1.508(3) . ? 
C16 C15 1.366(3) . ? 
N1 C6 1.331(3) . ? 
N1 C5 1.342(3) . ? 
C6 C7 1.391(3) . ? 
C3 C7 1.378(3) . ? 
C3 C4 1.385(3) . ? 
C3 C2 1.515(3) . ? 
C2 C1 1.491(4) . ? 
C18 C19 1.449(4) . ? 
C5 C4 1.365(4) . ? 
 
loop_ 
 _geom_angle_atom_site_label_1 
 _geom_angle_atom_site_label_2 
 _geom_angle_atom_site_label_3 
 _geom_angle 
 _geom_angle_site_symmetry_1 
 _geom_angle_site_symmetry_3 
 _geom_angle_publ_flag 
C12 N3 C8 118.23(16) . . ? 
C12 N4 C13 127.03(15) . . ? 
C13 N5 C15 116.35(18) . . ? 
C6 N2 C8 130.09(17) . . ? 
N3 C12 N4 117.73(16) . . ? 
N3 C12 C11 122.99(17) . . ? 
N4 C12 C11 119.24(16) . . ? 
N5 C13 N4 114.16(17) . . ? 
N5 C13 C14 122.87(18) . . ? 
N4 C13 C14 122.88(18) . . ? 
C17 C14 C13 119.6(2) . . ? 
C10 C11 C12 117.52(18) . . ? 
N3 C8 N2 112.58(16) . . ? 
N3 C8 C9 122.30(17) . . ? 
N2 C8 C9 125.11(18) . . ? 
C10 C9 C8 117.73(19) . . ? 
C14 C17 C16 117.5(2) . . ? 
C14 C17 C18 121.1(2) . . ? 
C16 C17 C18 121.4(2) . . ? 
C15 C16 C17 119.1(2) . . ? 
C6 N1 C5 116.0(2) . . ? 
N1 C6 N2 119.22(18) . . ? 
N1 C6 C7 122.55(19) . . ? 
N2 C6 C7 118.22(18) . . ? 
C11 C10 C9 121.14(18) . . ? 
N5 C15 C16 124.5(2) . . ? 
C7 C3 C4 116.9(2) . . ? 
C7 C3 C2 119.4(2) . . ? 
C4 C3 C2 123.7(2) . . ? 
C3 C7 C6 120.5(2) . . ? 
C1 C2 C3 117.0(2) . . ? 
C19 C18 C17 118.4(2) . . ? 
N1 C5 C4 125.1(2) . . ? 
C5 C4 C3 118.9(2) . . ? 
 
_diffrn_measured_fraction_theta_max    0.995 
_diffrn_reflns_theta_full              25.04 
_diffrn_measured_fraction_theta_full   0.995 
_refine_diff_density_max    0.338 
_refine_diff_density_min   -0.291 
_refine_diff_density_rms    0.042 

#===END of H2etpda================
